# Supplementary material for: Electric double layer capacitors of high volumetric energy based on ionic liquids and hierarchical-pore carbon
Source: Royal Society of Chemistry journal article supplement (doi:10.1039/c4ta01468e), 2014-01-01
Supplement: c4ta01468e1.pdf [file c4ta01468e1.pdf]

Electronic Supplementary Information

**Electric Double Layer Capacitors of High Volumetric Energy Based  
on Ionic Liquids and Hierarchical-Pore Carbon**

Hsin-Chieh Huang,<sup>1</sup> Cheng-Wei Huang,<sup>2</sup> Chien-Te Hsieh,<sup>3</sup> Hsisheng Teng<sup>1,4,\*</sup>

<sup>1</sup>Department of Chemical Engineering and Research Center for Energy  
Technology and Strategy, National Cheng Kung University, Tainan 70101, Taiwan

<sup>2</sup>Taiwan Textile Research Institute, Taipei 23674, Taiwan

<sup>3</sup>Department of Chemical Engineering and Materials Science, Yuan Ze Fuel Cell  
Center, Yuan Ze University, Taoyuan 32023, Taiwan

<sup>4</sup>Center for Micro/Nano Science and Technology, National Cheng Kung  
University, Tainan 70101, Taiwan

\*To whom correspondenc should be addressed. E-mail: [hteng@mail.ncku.edu.tw](mailto:hteng@mail.ncku.edu.tw),

Tel: 886-6-2385371, Fax: 886-6-2344496

**Electronic supplementary information for:**

- 1. Chemical structures of EMIm-TFSI and MPPy- TFSI,**
- 2. Cyclic voltammograms of the aMP cell obtained by varying the voltage window in MPPy-TFSI,**
- 3. Variation of the  $R_{es}$  and  $R_w$  with the applied voltages for different cells,**
- 4. Capacitance retention with cycle number for the aMP and tMC symmetric cells.**

# 1. Chemical structures of EMIm-TFSI and MPPy- TFSI

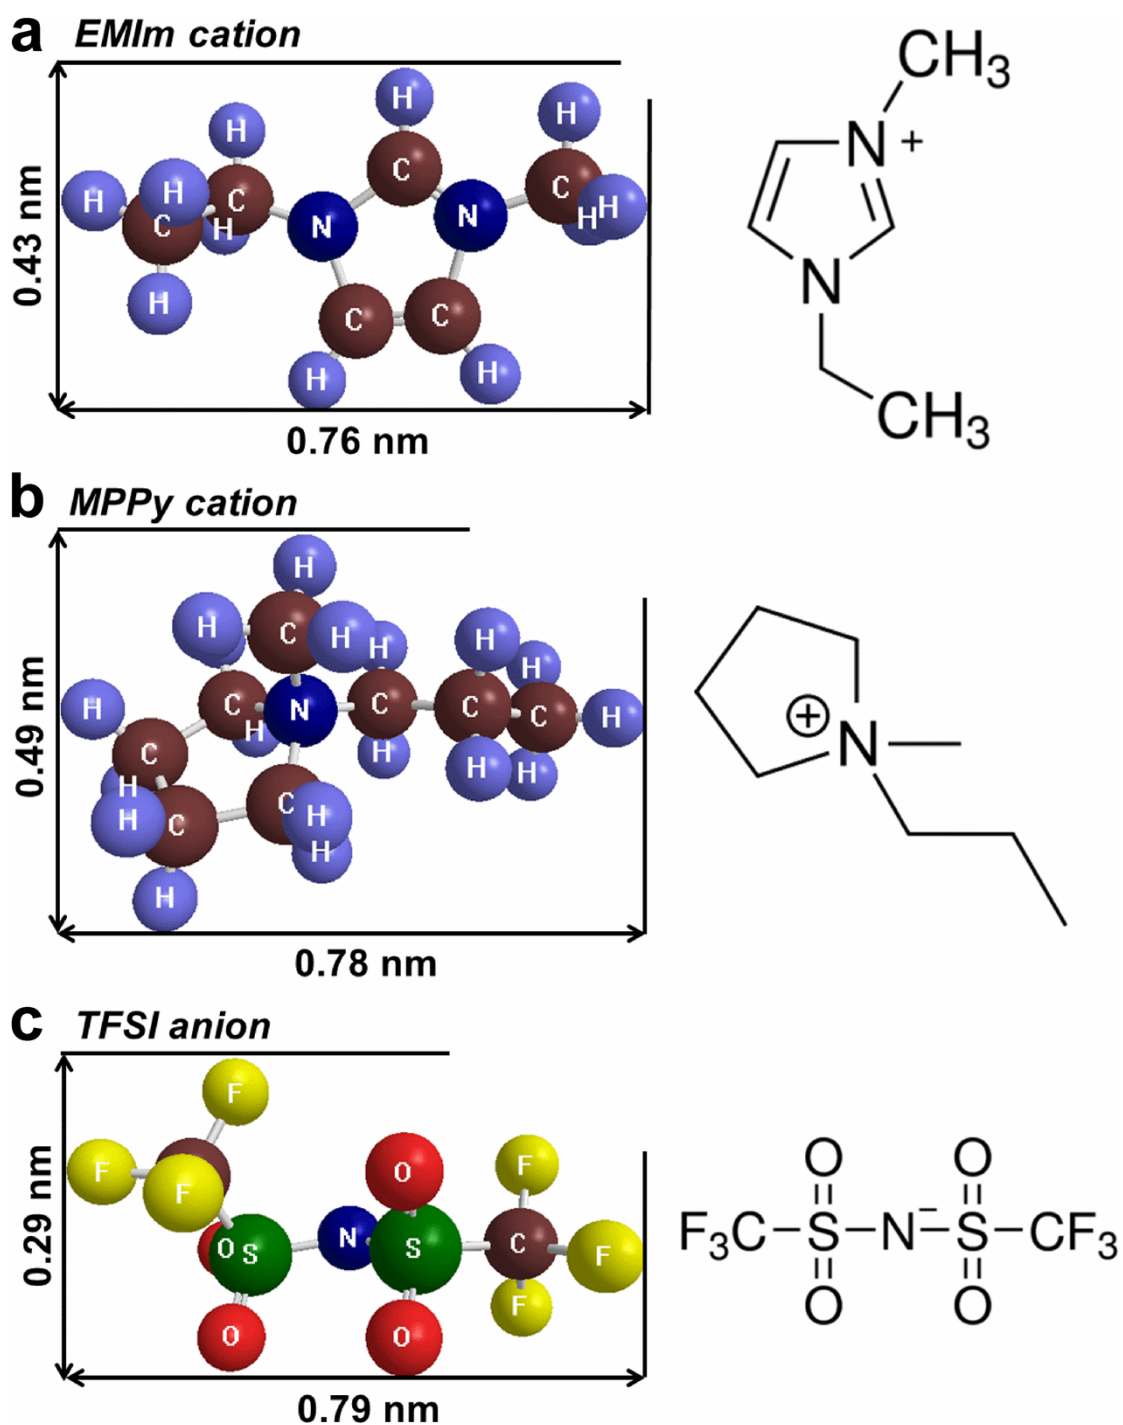

**Fig. S1.** Chemical structures of 1-ethyl-3-methylimidazolium bis(trifluoromethylsulfonyl)imide (EMIm-TFSI) and 1-methyl-1-propylpyrrolidinium bis(trifluoromethylsulfonyl)imide (MPPy-TFSI): (a) EMIm cation, (b) MPPy cation, and (c) TFSI anion.

2. Cyclic voltammograms of the aMP cell obtained by varying the voltage window in MPPy-TFSI

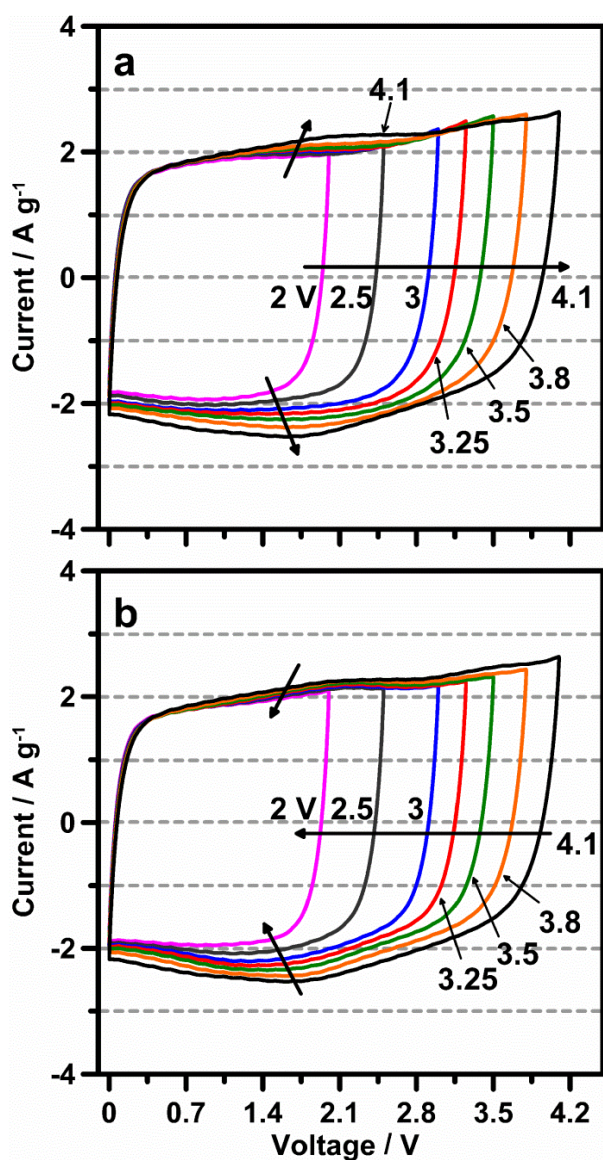

**Fig. S2.** Cyclic voltammograms of the symmetric aMP cell obtained sequentially by: (a) gradually extending the voltage window from 2 to 4.1 V; (b) reversing the direction of voltage-window variation from 4.1 to 2 V. The cell was assembled using MPPy-TFSI and operated at a scan rate of  $50 \text{ mV s}^{-1}$ .

### 3. Variation of the $R_{es}$ and $R_w$ with the applied voltages for different cells

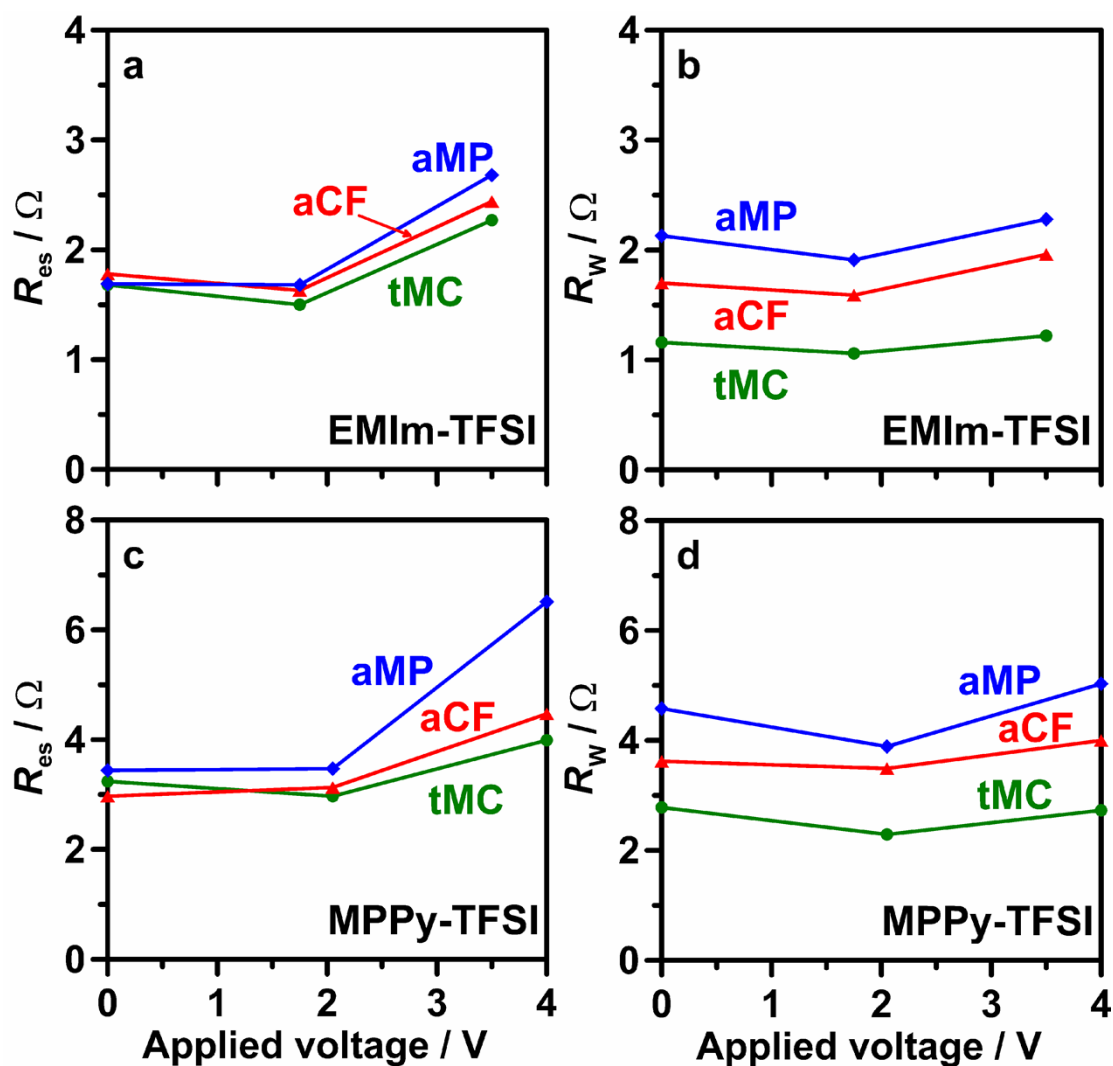

**Fig. S3.** Variation of the  $R_{es}$  and  $R_w$  values with the applied voltages for the symmetric aMP, aCF, and tMC cells assembled with different electrolytes: (a,b) EMIm-TFSI; (c,d) MPPy-TFSI.

4. Capacitance retention with cycle number for the aMP and tMC symmetric cells

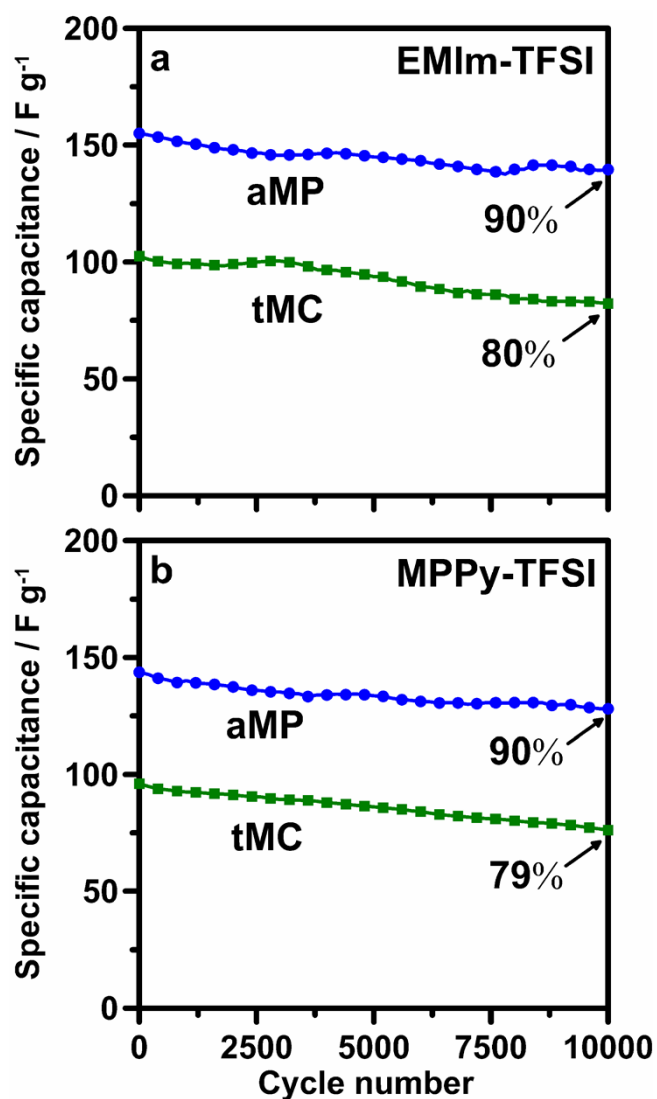

**Fig. S4.** Variation of specific capacitance retention with cycle number for the aMP and tMC symmetric cells assembled with electrolytes EMIm-TFSI (a) and MPPy-TFSI (b). The cells were galvanostatic charge and discharge at  $10 \text{ A g}^{-1}$  ( $40 \text{ mA cm}^{-2}$ ) within 0–3.5 V in EMIm-TFSI and 0–4.1 V in MPPy-TFSI.
